# Supplementary material for: Neoantigen DNA vaccines are safe, feasible, and induce neoantigen-specific immune responses in triple-negative breast cancer patients
Source: PubMed Central journal article supplement (PMC11562513; doi:10.1186/s13073-024-01388-3), 2024-11-14
Supplement: 13073_2024_1388_MOESM1_ESM.pdf [file 13073_2024_1388_MOESM1_ESM.pdf]

Fig. S1

A

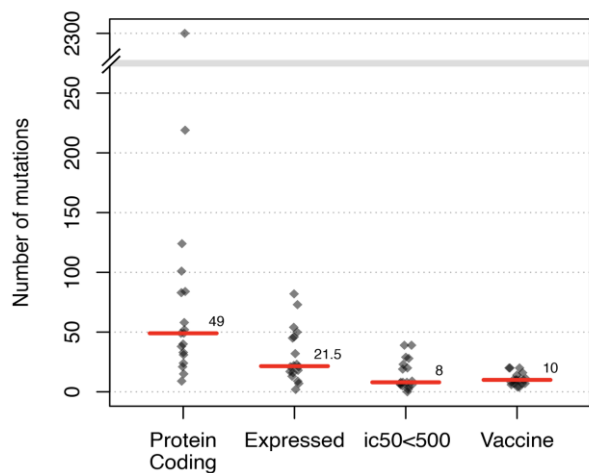

B

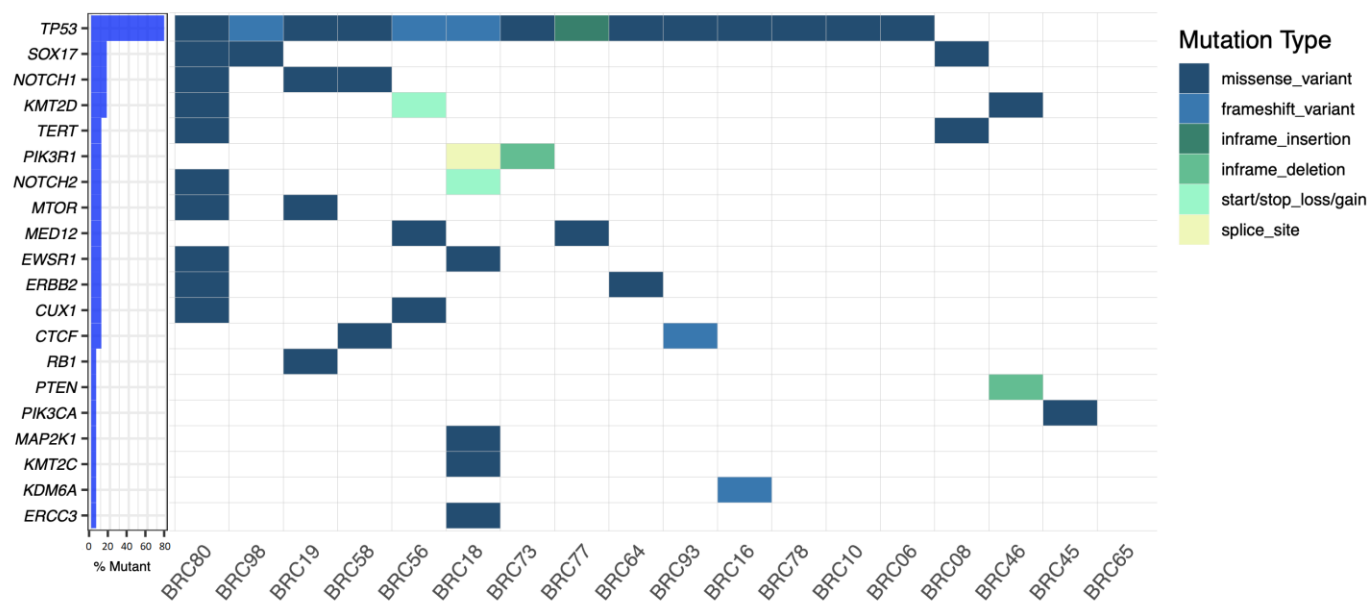

C

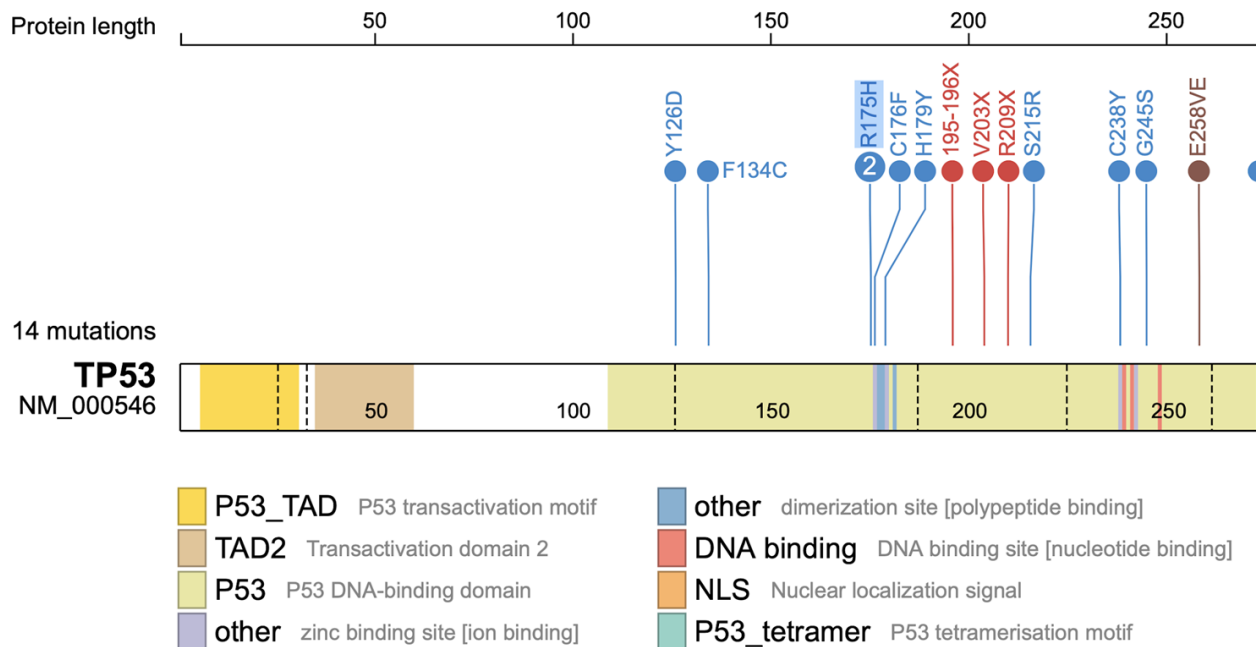

**Fig. S1. pVAC-seq analysis allows for prioritization of somatic mutations for inclusion in the neoantigen DNA vaccines.** (A) Filtering plot: Counts of mutations at each stage of the mutation filtering process. Red lines and labels indicate median values. All protein-altering mutations were initially considered, followed by prioritization of those with variants expressed in the RNA, then with predicted binding affinities less than 500nm. The higher final number of mutations represented in the vaccines reflect the decision to relax binding and expression thresholds slightly to identify additional neoantigens for inclusion in some cases. (B) Waterfall plot: Mutational landscape of samples, showing protein-altering mutations in cancer-related genes. Genes are ordered by frequency and colored by alteration type. (C). Overview of mutations occurring within the TP53 gene, with the only recurrent mutation (R175H) indicated by a "2".

Fig. S2

A

BRC19 – ZNF165

|               |                                                |
|---------------|------------------------------------------------|
| <b>ZNF165</b> | <b>EKIESQR<u>IISGR</u><u>M</u>SGYISEASGESQ</b> |
| OP-1          | EKIESQR <u>IISGR</u> <u>M</u> SGY              |
| OP-2          | QR <u>IISGR</u> <u>M</u> SGYISEAS              |
| OP-3          | GR <u>M</u> SGYISEASGESQ                       |

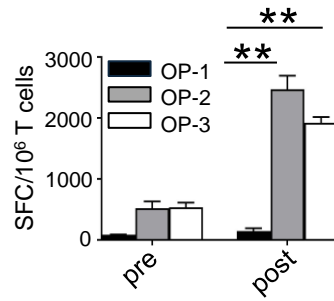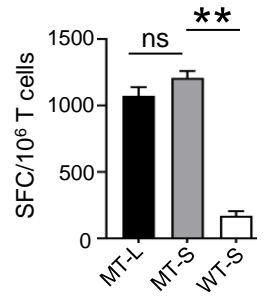

B

BRC19 – UBA7

|             |                                         |
|-------------|-----------------------------------------|
| <b>UBA7</b> | <b>DEELYSR<u>QLYVLC</u>SPAMQRIQGARV</b> |
| OP-1        | DEELYSR <u>QLYVLC</u> SPA               |
| OP-2        | SR <u>QLYVLC</u> SPAMQRIQ               |
| OP-3        | V <u>L</u> CSPAMQRIQGARV                |

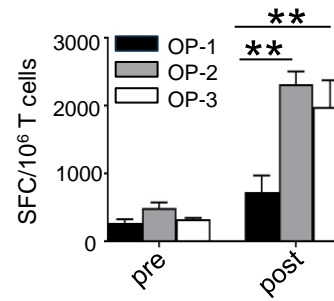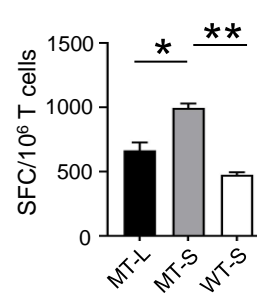

**Fig. S2. Specificity of immune response to predicted candidate neoantigens before and after vaccination.** PBMCs at baseline (pre-vax) and after vaccination (2 weeks post 3<sup>rd</sup> vax) were stimulated with pooled OP encoding two candidate neoantigens for 12 days. For each patient, T cell IFN- $\gamma$  ELISpot assays against pooled (MT-L) and individual OPs (OP1-3), as well as the minimal predicted neoantigen (MT-S) and matching wild type peptide (WT-S) were performed on day 12 by co-culturing cells overnight with autologous, irradiated PBMC pulsed with peptide. (A) The sequences of individual OPs for patients BRC19 neoantigen ZNF165 and patient BRC19 neoantigen UBA17 are listed. (B) IFN- $\gamma$  ELISpot data for pre- vs post-vaccination cells are shown. Different OPs are indicated in color (black: OP-1; gray: OP-2; white: OP-3). The negative control in the ELISpot assays included responder T cells cultured with no peptide (number of spot-forming cells per 10<sup>6</sup> cells was 10–120). The background (i.e. no peptide) was subtracted from the experimental condition in each case. Data are presented as means  $\pm$  SEM (n =2 - 3 wells per peptide in ELISpot assay) and are representative of three independent experiments. Samples were compared using unpaired, Student's t-test (\*, P < 0.05; \*\*, P < 0.01); SFC, spot-forming cells. ELISpot experiments were performed in duplicate or triplicate wells per condition.

Supplementary figure 3

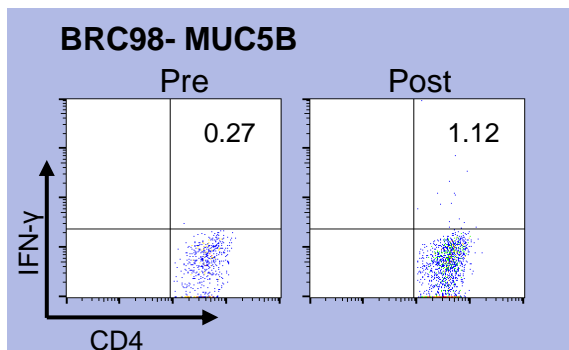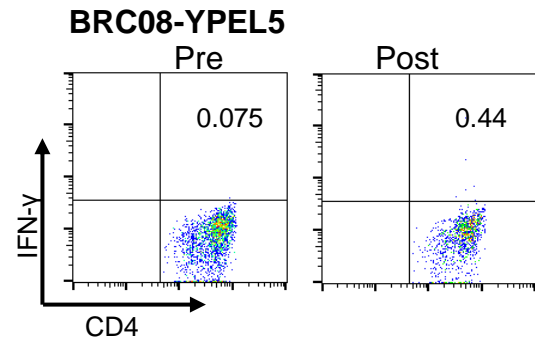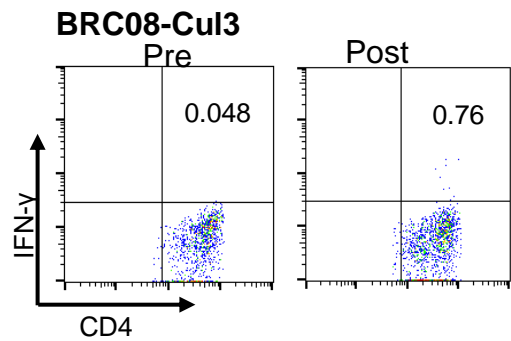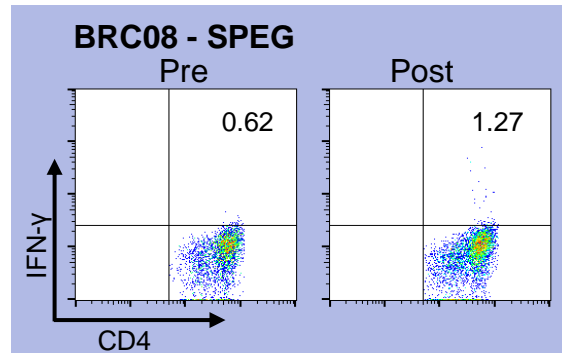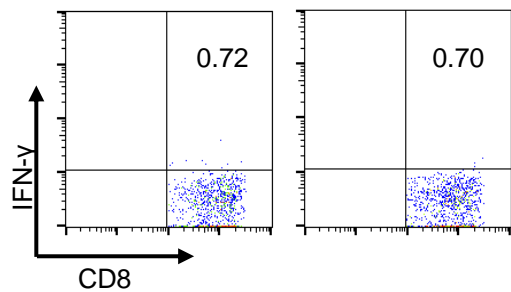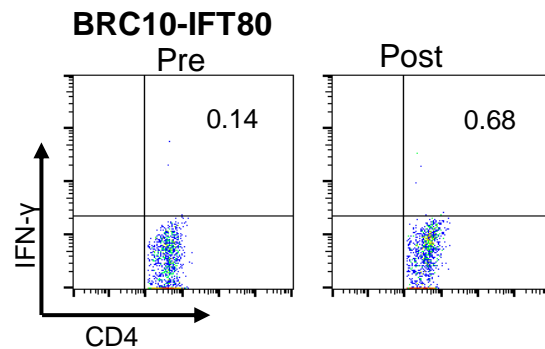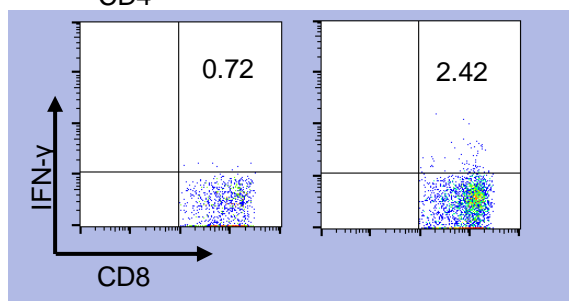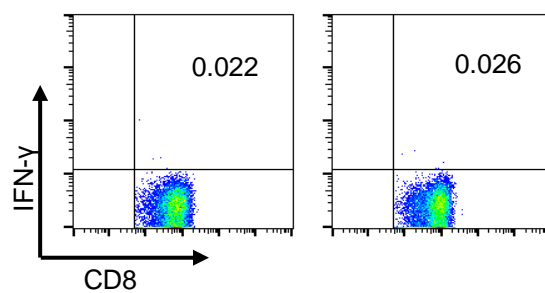

Supplementary figure 3-cont.

**BRC10-UBQLN4**

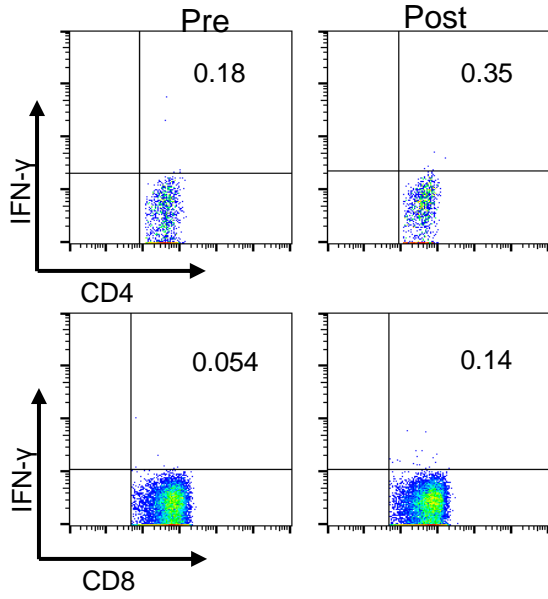

**BRC18-CPNE3**

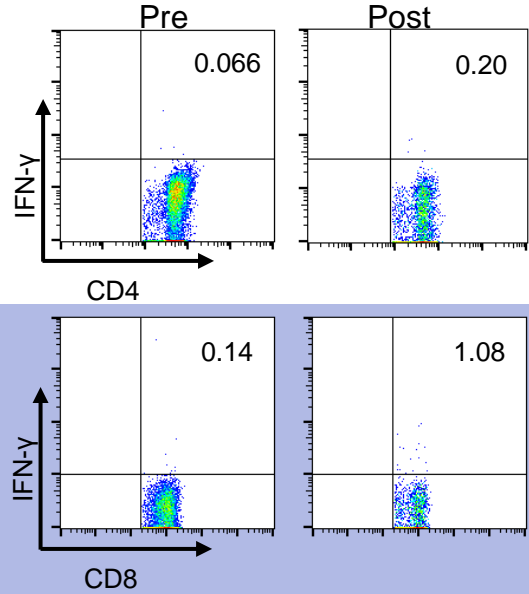

**BRC 18- NNT**

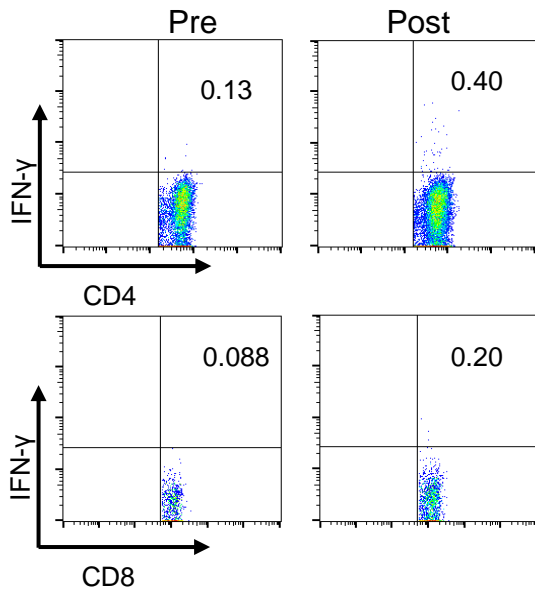

**BRC18- EHMT1**

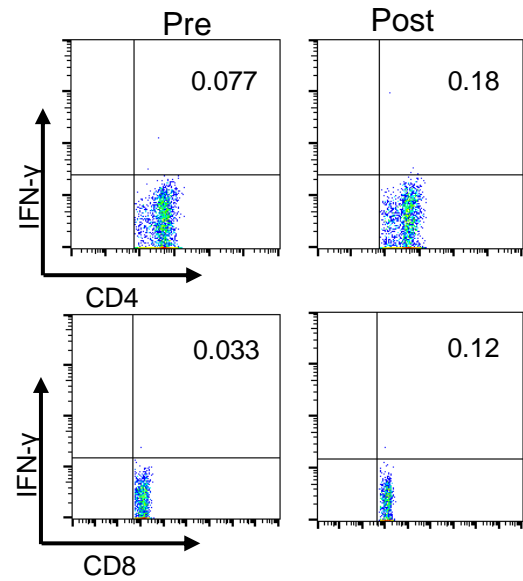

**BRC 18- KMT2C**

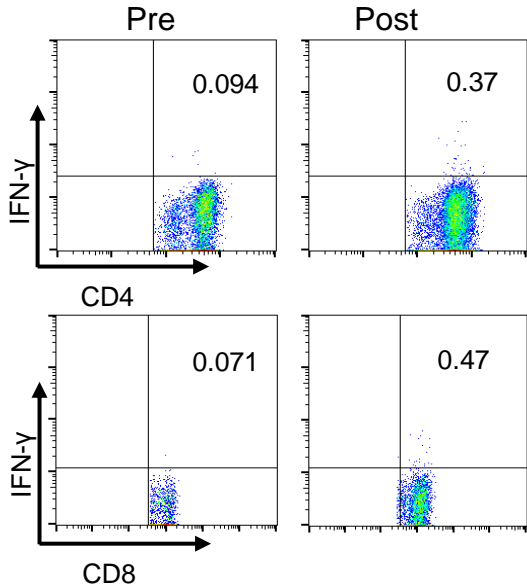

**BRC19- ZNF165**

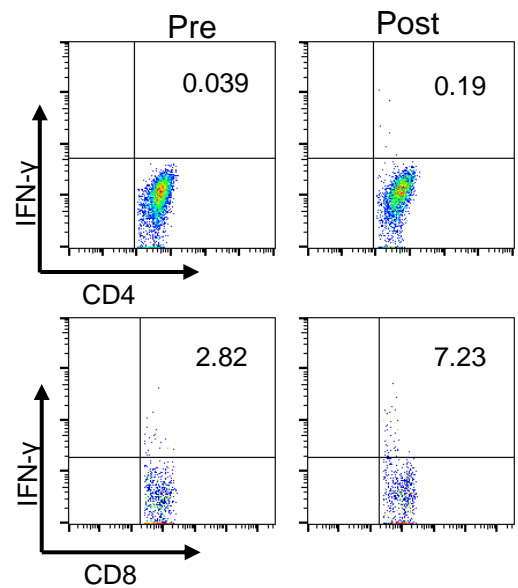

Supplementary figure 3-cont.

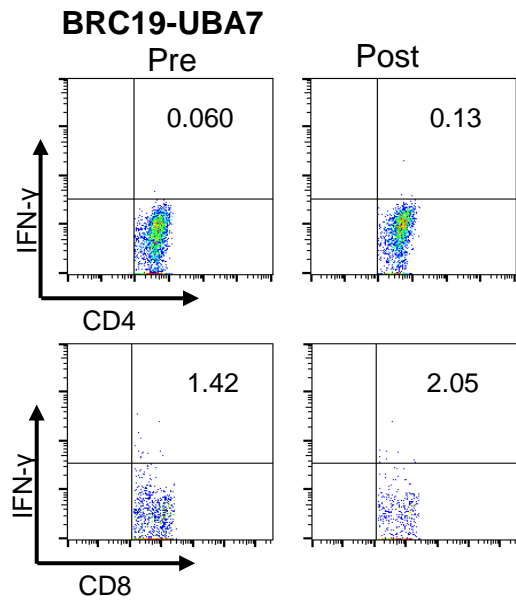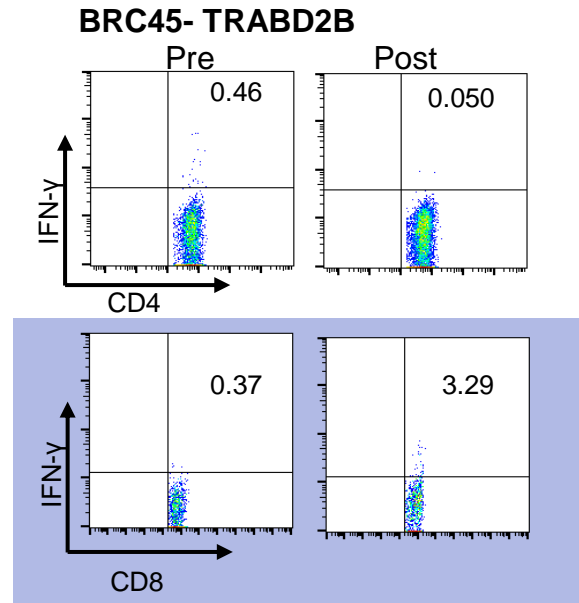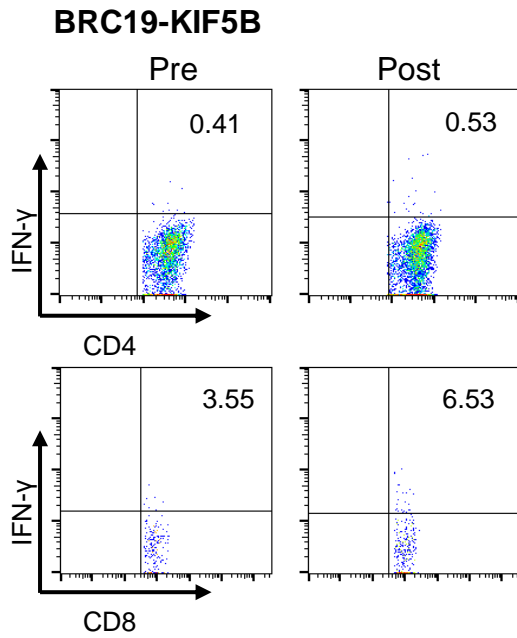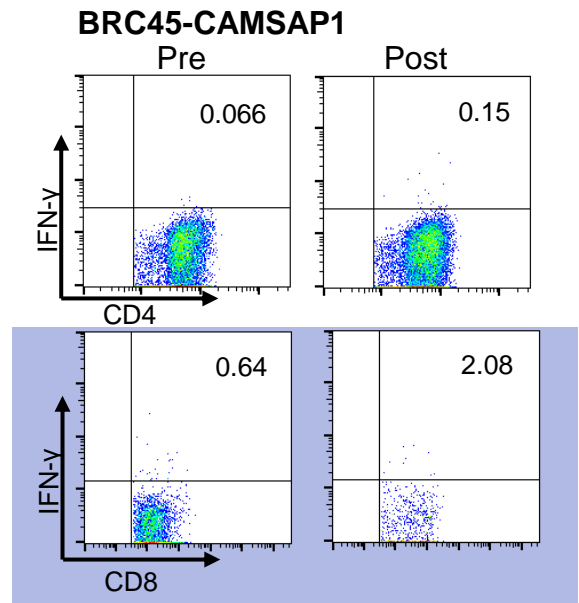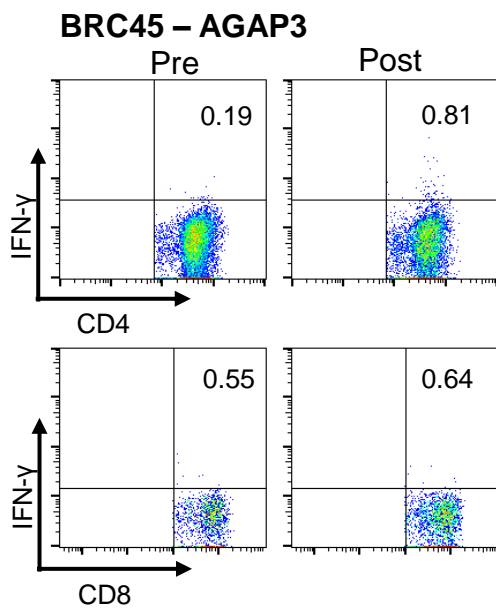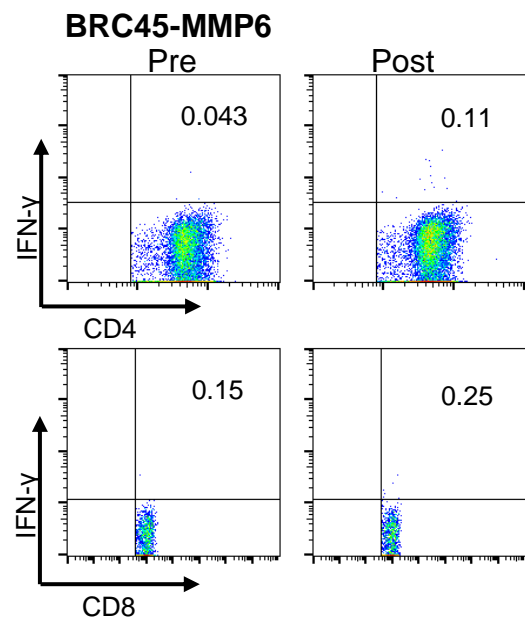

Supplementary figure 3-cont.

**BRC46-RAPGEF4**

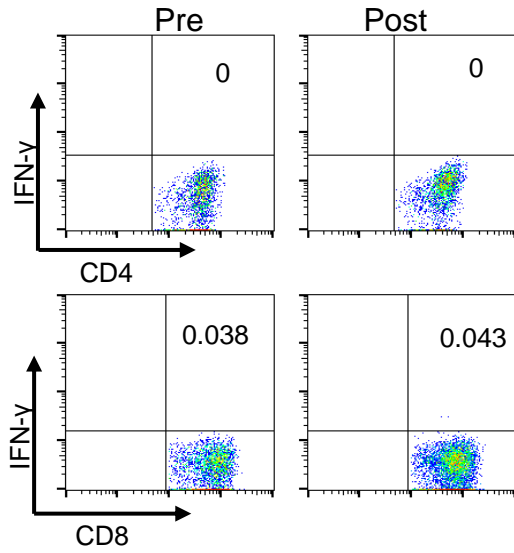

**BRC46-GRINA2A**

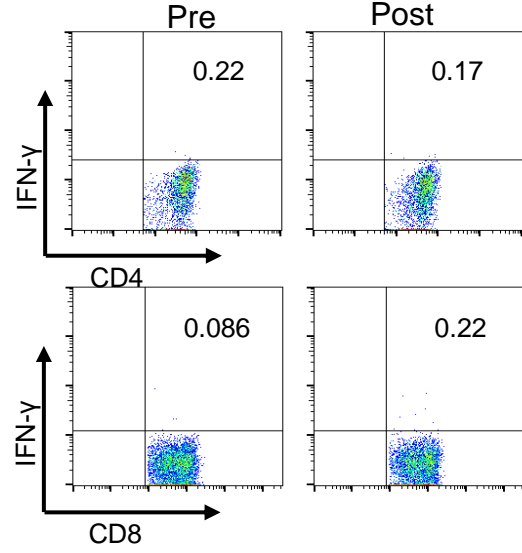

**BRC46-ANXA6**

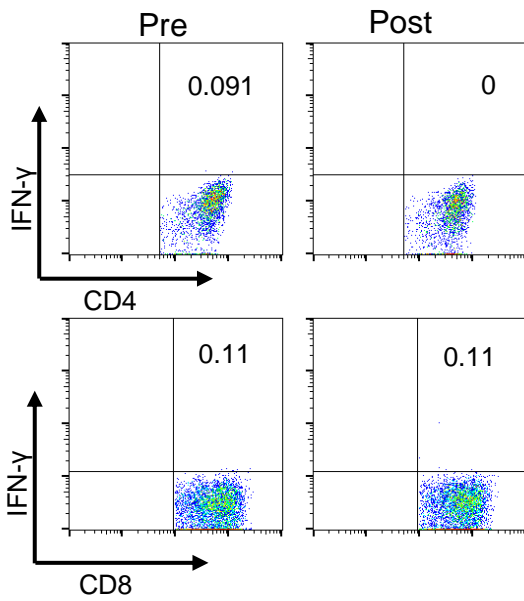

**BRC46-ARVCF**

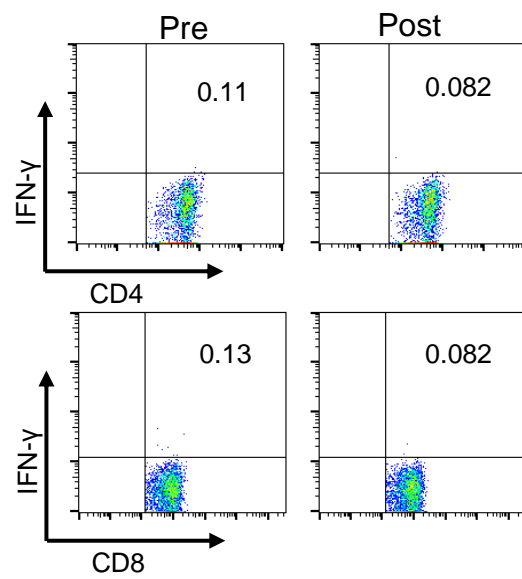

**BRC46-HEBP2**

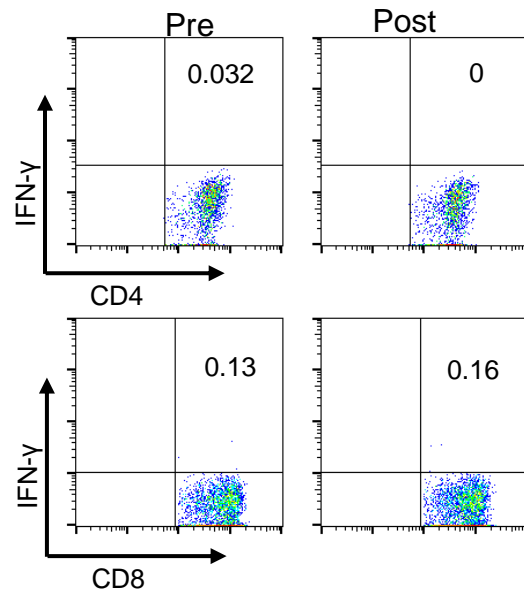

**BRC56-MICALL2**

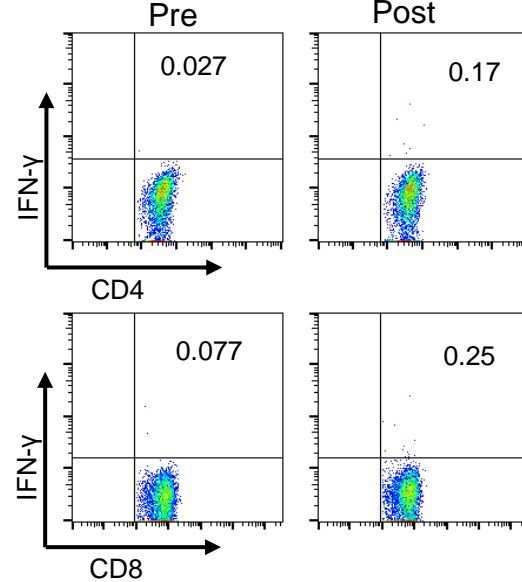



Supplementary figure 3-cont.

**BRC58- ZNF469**

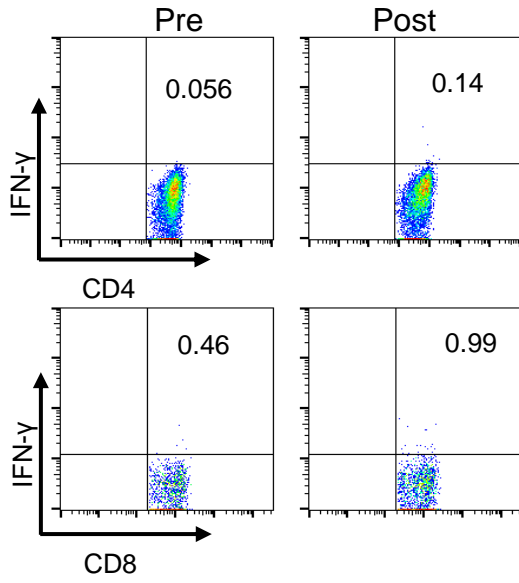

**BRC64-TP53**

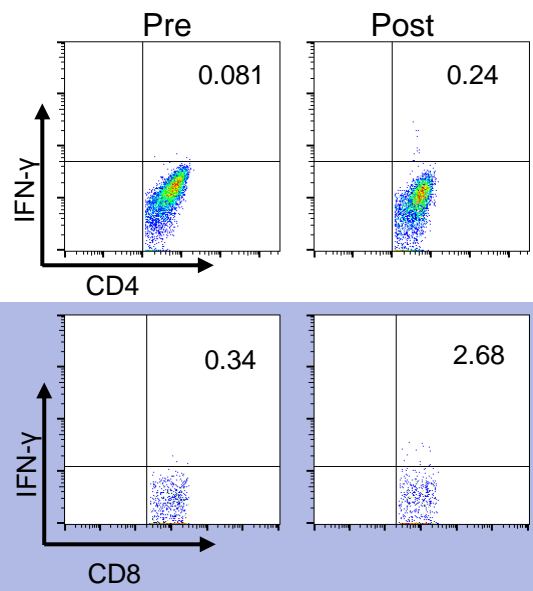

**BRC58-C10orf129**

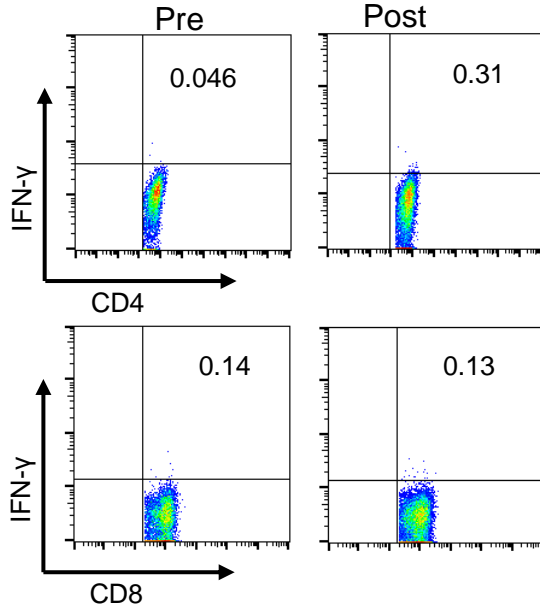

**BRC65-PPIF**

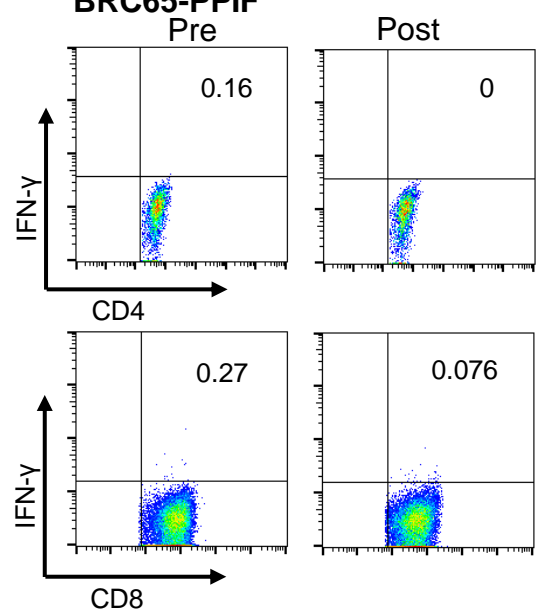

**BRC58- THBS4**

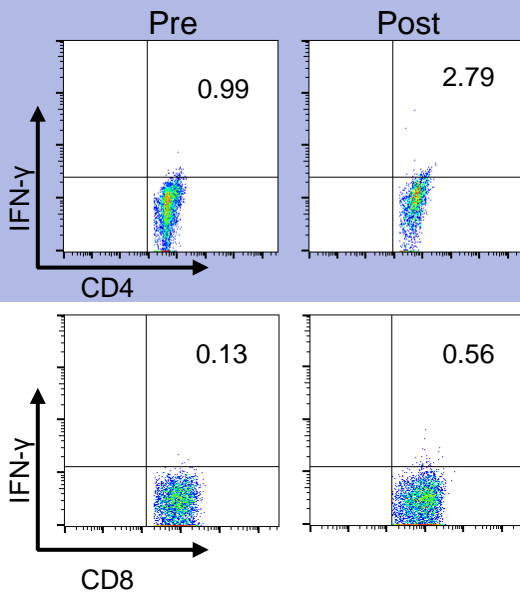

**BRC65-PIK3CA**

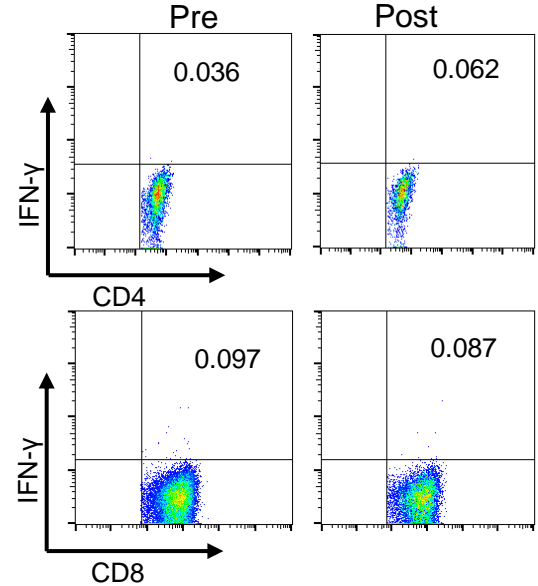

Supplementary figure 3-cont.

**BRC65-GGNPB2**

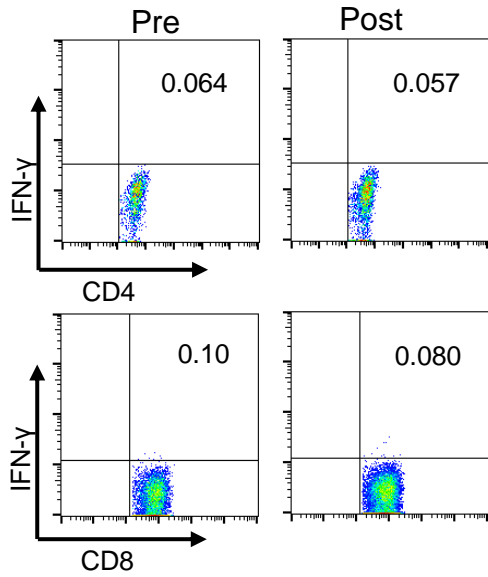

**BRC73-SUMF2**

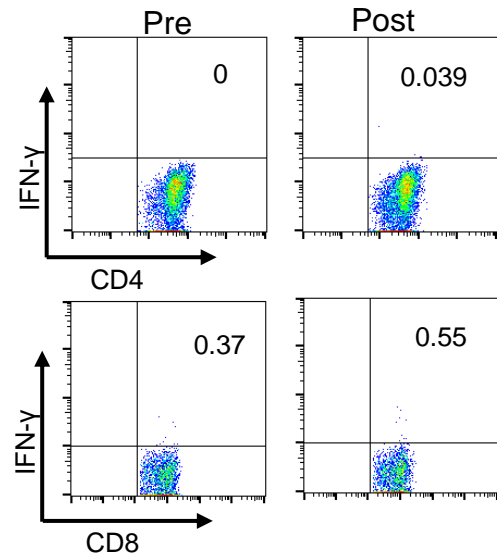

**BRC73-PEX1**

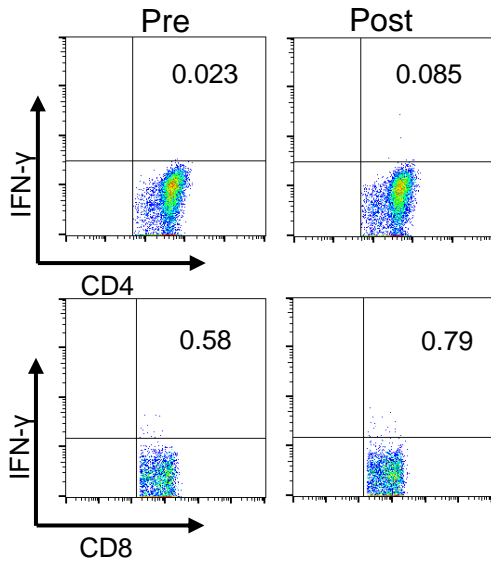

**BRC73-PRDM15**

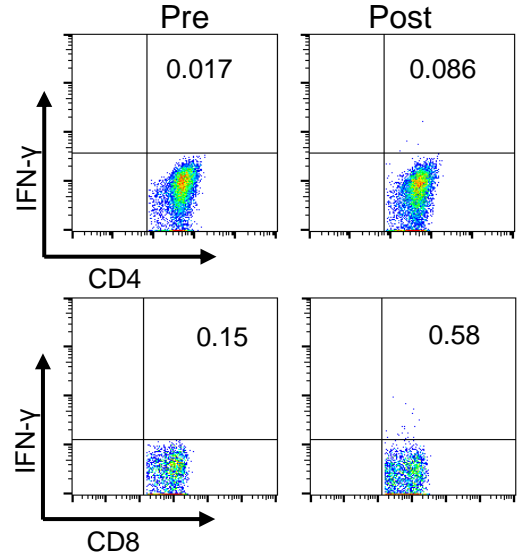

**BRC73-NRCAM**

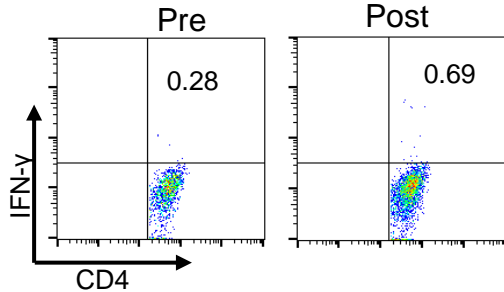

**BRC73-ACSL3**

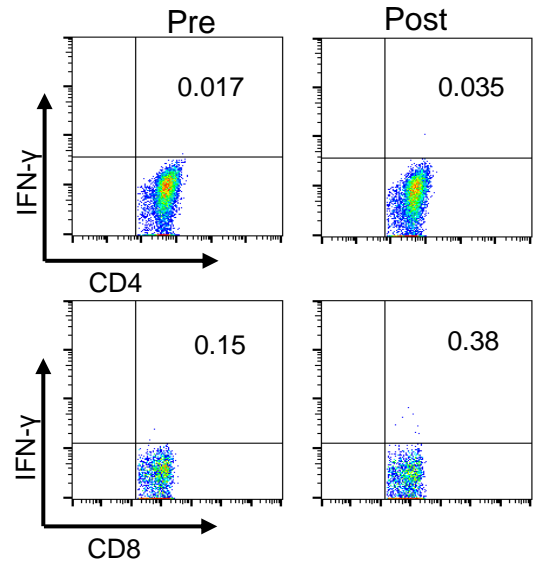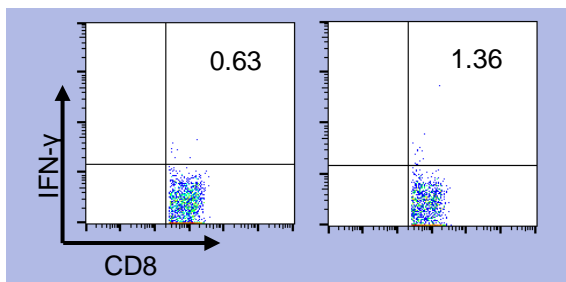

Supplementary figure 3-cont.

**BRC78-CHD6**

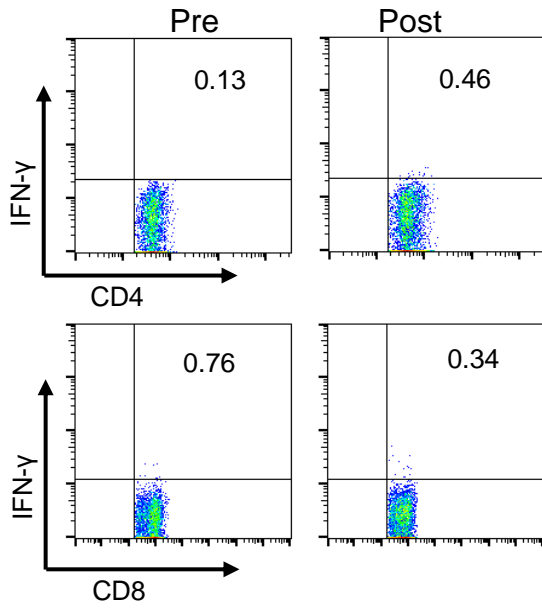

**BRC78-CFTR**

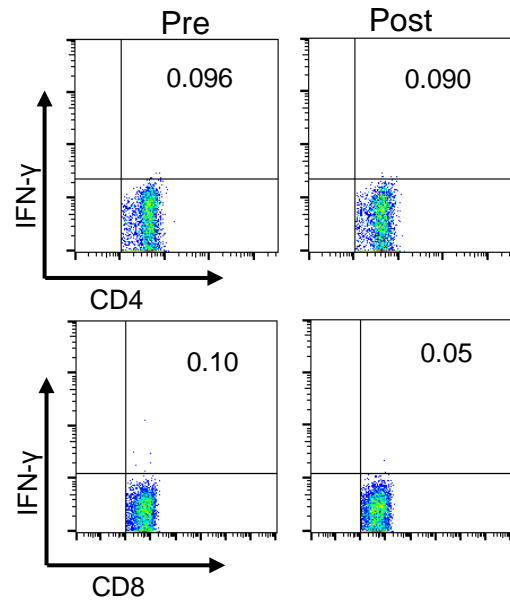

**BRC78-SCN7A**

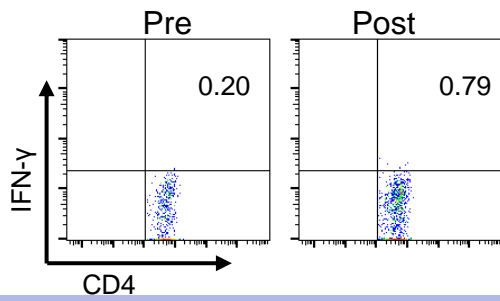

**BRC98-COG2**

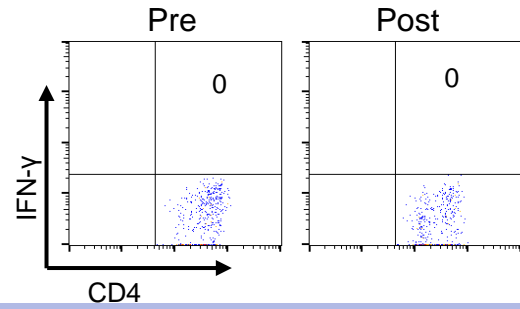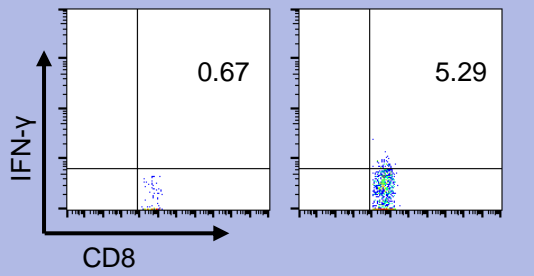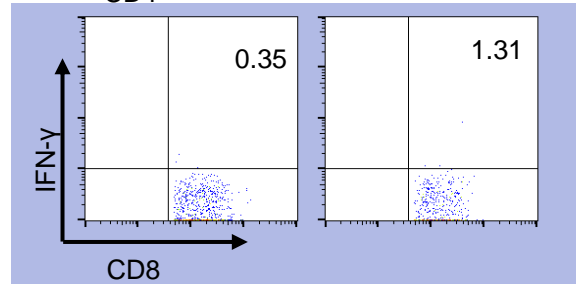

**BRC78-DNMT3A**

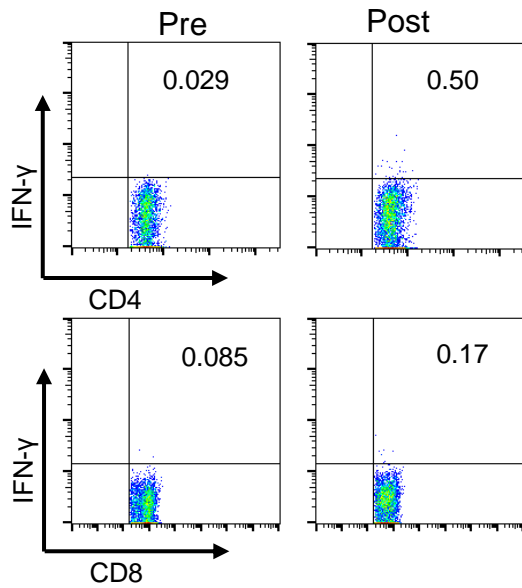

**BRC98-AHNAK2**

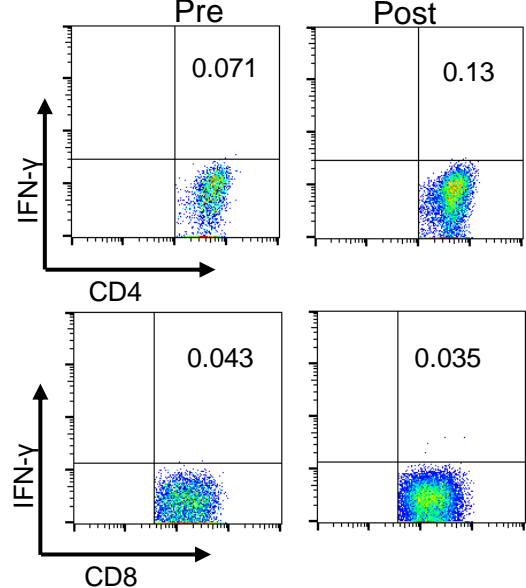

**Fig. S3. Neoantigen vaccines elicit both CD4 and CD8 T cell responses.** ICS results of all confirmed neoantigens outside of PIGM, ASB18, and MIB2. T cells from *in vitro* cultures as described in Figure 4 were analyzed by ICS for intracellular IFN- $\gamma$  production after neoantigen peptide stimulation. Data represent percentage increase from pre- to post-vaccination. Increases between pre- and post-vaccination are considered positive when a two-fold or greater increase is observed in percent positive cells, with a minimum percent positive of  $\geq 1\%$  in the post-vaccination sample. All positive neoantigen responses are indicated by blue shading.

Fig. S4

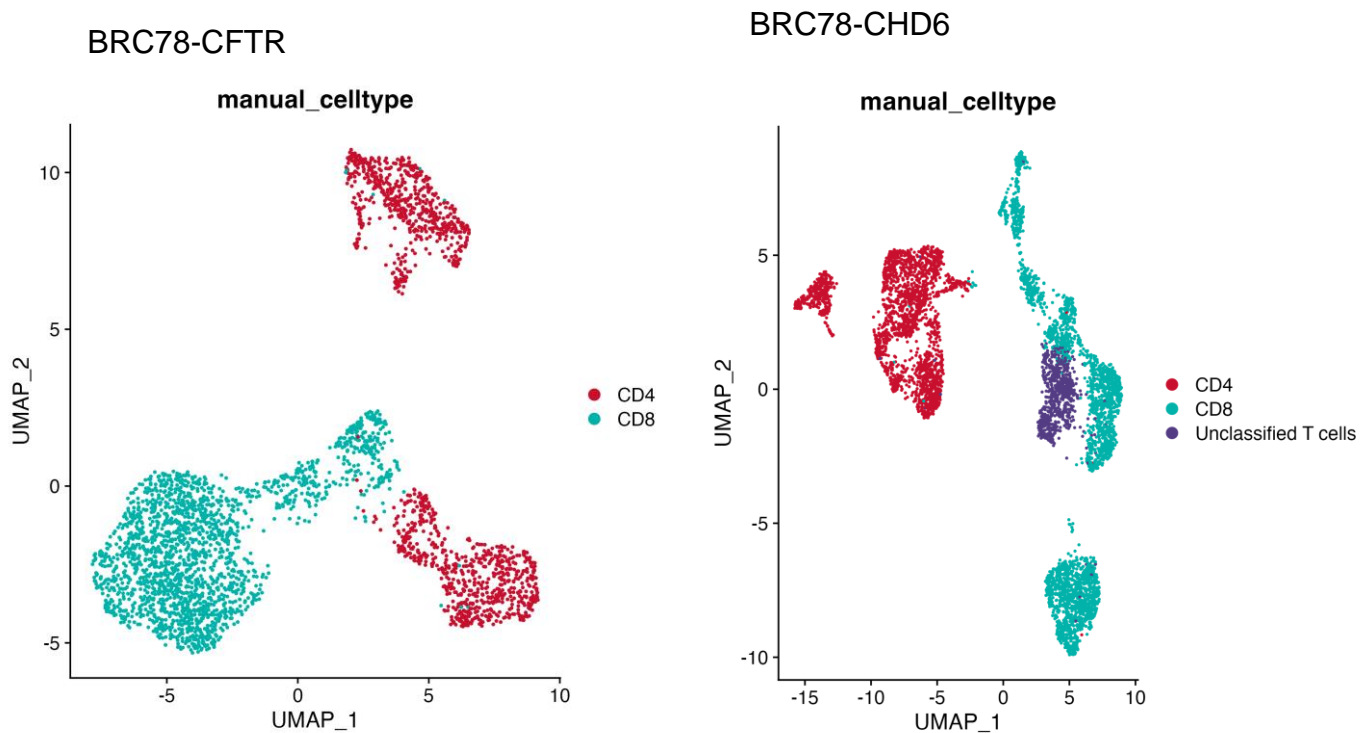

**BRC78: CFTR antigen reactive T cell sequence analysis**

| TRAV         | TRBV          | TRBV CDR3 aa sequence  | Frequency (%) in scTCR seq |
|--------------|---------------|------------------------|----------------------------|
| V38J43C      | V27DJ2-1C2    | <b>CASSLYRGSYNEQFF</b> | 41.1                       |
| V13-1J3      | V19DJ2-1C1    | CASSFNGYSGVEQFF        | 11.2                       |
| V38-2/DV8J43 | V7-9-1DJ1-2C1 | CASSLTDRTAVEGYTF       | 5.3                        |
| V29/DV5J31C  | V5-6DJ2-2C2   | CASSWGLDWEVTGELFF      | 4.1                        |
| V12-2J6C     | V7-6DJ2-2C2   | CASSLAWPGTRGTGELFF     | 3.2                        |
| V10J36C      | V3-1DJ1-2C1   | CASSQDFGADGYTF         | 3                          |
| V5J39C       | V3-1DJ1-2C1   | CASSQDFGADGYTF         | 2.5                        |

Bold in red: Listed in the figure 5.

**BRC78:CHD6 antigen reactive T cell sequence analysis**

| TRAV      | TRBV         | TRBV CDR3 aa sequence  | Frequency (%) in scTCR seq |
|-----------|--------------|------------------------|----------------------------|
| V12-2J39C | V6-5DJ1-3C1  | <b>CASSQGQTGNTIYF</b>  | 21.6                       |
| V10J44C   | V6-5DJ1-3C1  | <b>CASSQGQTGNTIYF</b>  | 21.5                       |
| V38-1J26C | V29-1DJ1-1C1 | CSVESGLGTEAFF          | 11.5                       |
| V8-6J58C  | V5-4DJ1-3C1  | <b>CASSLWGARNIYF</b>   | 10.1                       |
| V38-2J31C | V14DJ2-1C2   | CASSEYGSSYNEQFF        | 8.6                        |
| V8-4J54C  | V7-2DJ2-6C2  | <b>CASSLPGAGANVLTF</b> | 3.6                        |
| V12-3J45C | V20-1DJ2-7C2 | CASGTGSEKLFF           | 2                          |

Bold in black: shared CDR3 sequence in bulk TCRseq and scTCRseq

Bold in red: Listed in the figure 5.

**Fig. S4. scTCR-seq analysis shows a oligoclonal expansion of TCRs.** PBMC from patient BRC78, collected two weeks post vaccination was cultured for 22 days in the presence of either CFTR or CHD6 neoantigen peptide. Cells were tagged with antibodies to CD4 and CD8, and subjected to scTCR-seq. (A) UMAP plots show that both CD4 and CD8 T cells expanded in culture. (B) Assessment of the clonotypic phenotype showed outgrowth of selected TCRs that matched data from bulk TCR-seq, as shown in Figure 5.

Fig. S5

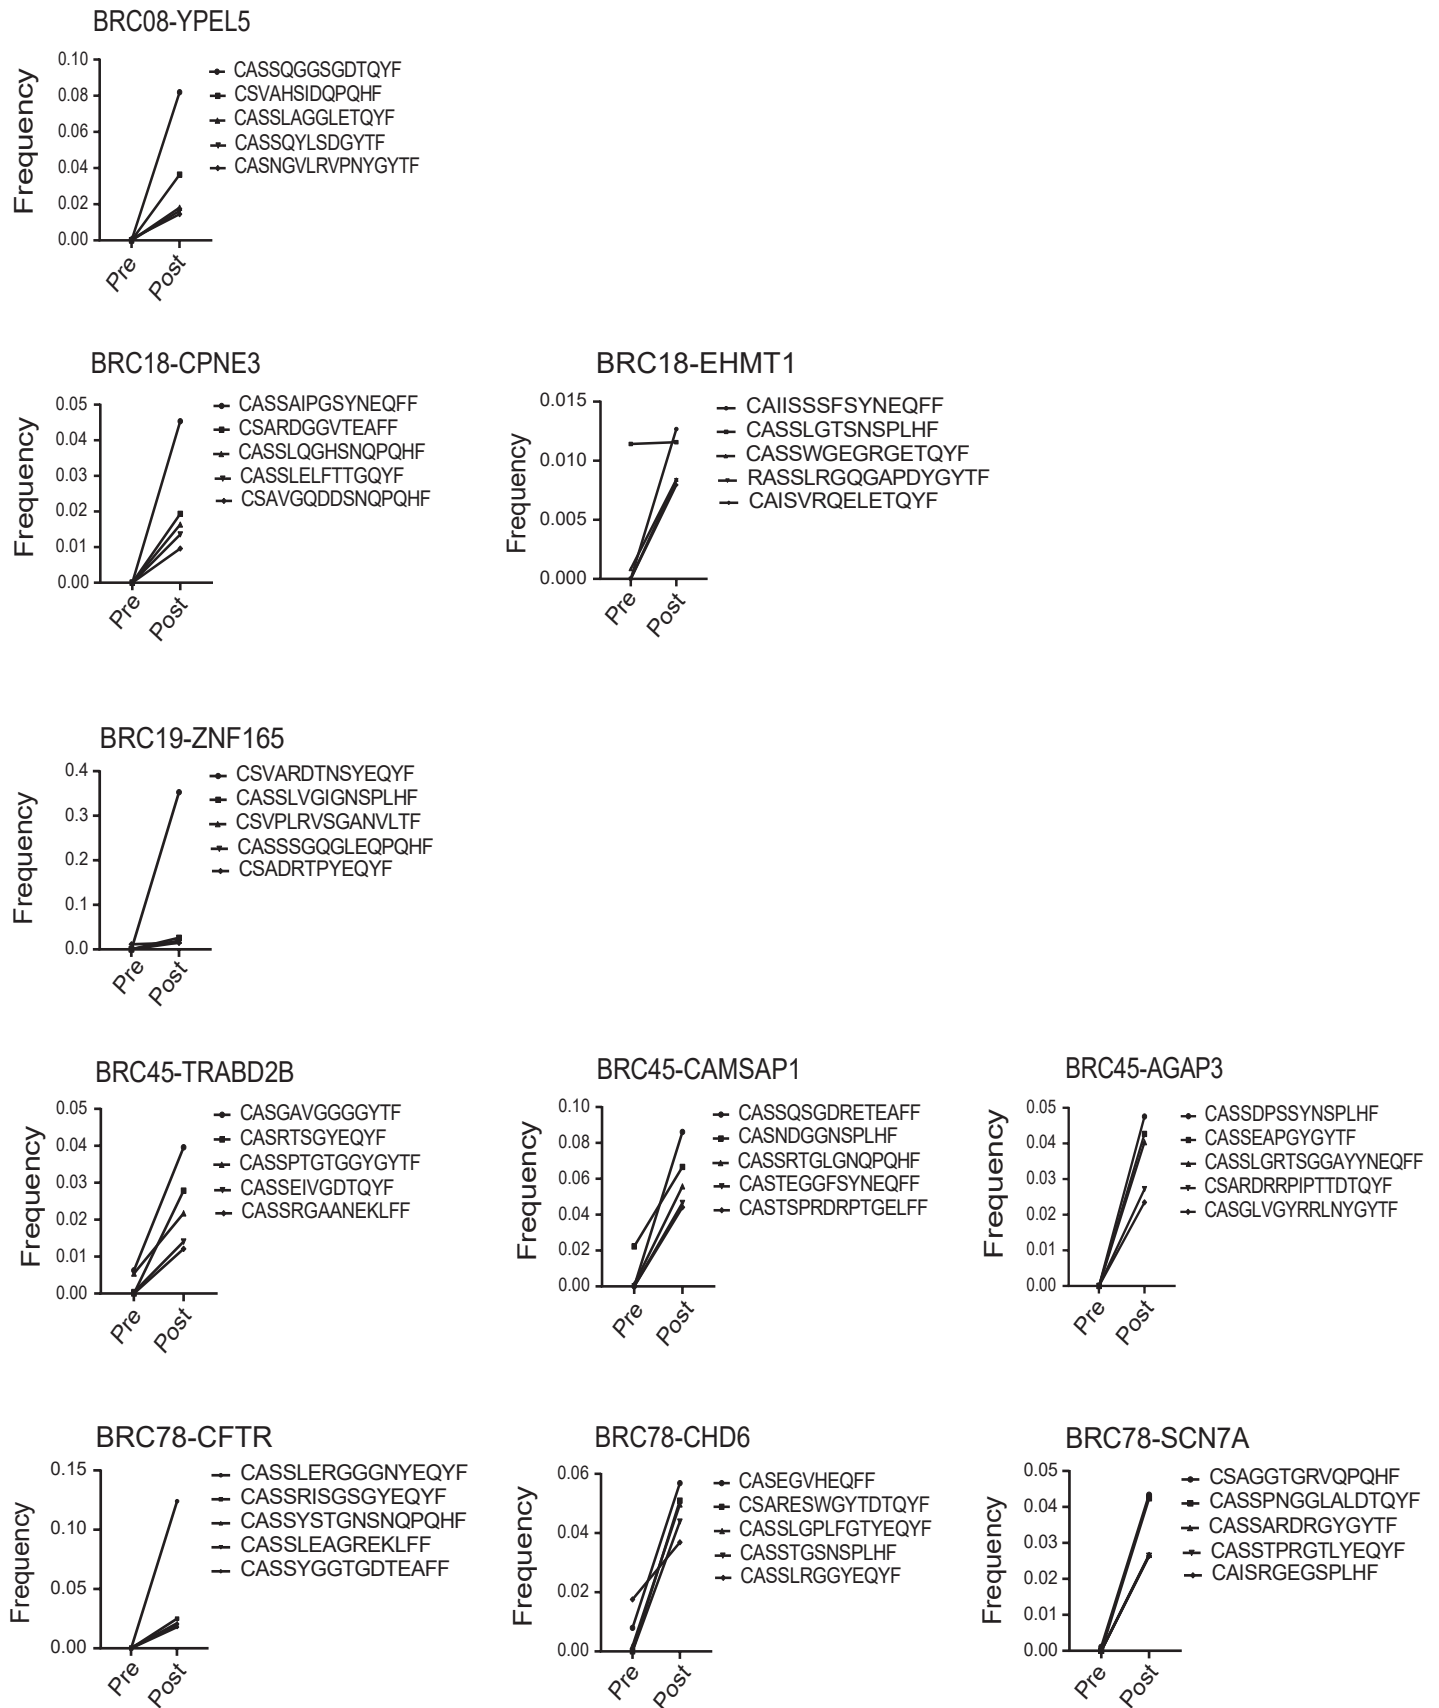

**Fig S5. Vaccination promotes expansion of select T cell clones.** Summary of TCRV $\beta$  clonotypes identified, using TCRV $\beta$  CDR3 reference libraries in T cells. PBMC obtained before and after vaccination were stimulated with neoantigen peptide for 12 days. Expanded T cells were subjected to sequencing for TCRV $\beta$  CDR3 regions for patients BRC78 (CFTR, SCN7A, CHD6), BRC18 (CPNE3 and EHMT1), BRC19 (ZNF165), BRC45 (TRABD2B, AGAP3, CAMSAP1), and BRC08 (YPEL5). Each symbol represents a unique CDR3 sequence and the frequencies of the top 5 CDR3 sequences detected in post vaccination samples are listed in each panel, as well as their matching frequencies in pre-vaccination samples.
