# Supplementary material for: Neoantigen DNA vaccines are safe, feasible, and induce neoantigen-specific immune responses in triple-negative breast cancer patients
Source: PubMed Central journal article supplement (PMC11562513; doi:10.1186/s13073-024-01388-3), 2024-11-14
Supplement: 13073_2024_1388_MOESM4_ESM.pdf [file 13073_2024_1388_MOESM4_ESM.pdf]

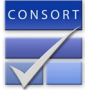

# CONSORT 2010 checklist of information to include when reporting a randomised trial\*

| Section/Topic             | Item No | Checklist item                                                                                                                        | Reported on page No                                                                                                                     |
|---------------------------|---------|---------------------------------------------------------------------------------------------------------------------------------------|-----------------------------------------------------------------------------------------------------------------------------------------|
| <b>Title and abstract</b> |         |                                                                                                                                       |                                                                                                                                         |
|                           | 1a      | Identification as a randomised trial in the title                                                                                     | Not applicable. The trial is not a randomized trial. The title has been revised to indicate that the trial is a phase 1 clinical trial. |
|                           | 1b      | Structured summary of trial design, methods, results, and conclusions (for specific guidance see CONSORT for abstracts)               | The abstract is structured and includes all of the information recommended in the CONSORT 2010 reporting guidelines.                    |
| <b>Introduction</b>       |         |                                                                                                                                       |                                                                                                                                         |
| Background and objectives | 2a      | Scientific background and explanation of rationale                                                                                    | Pages 3-4 of the manuscript.                                                                                                            |
|                           | 2b      | Specific objectives or hypotheses                                                                                                     | Page 4 of the manuscript.                                                                                                               |
| <b>Methods</b>            |         |                                                                                                                                       |                                                                                                                                         |
| Trial design              | 3a      | Description of trial design (such as parallel, factorial) including allocation ratio                                                  | Page 5 of the manuscript.                                                                                                               |
|                           | 3b      | Important changes to methods after trial commencement (such as eligibility criteria), with reasons                                    | NA.                                                                                                                                     |
| Participants              | 4a      | Eligibility criteria for participants                                                                                                 | Page 5 of the manuscript.                                                                                                               |
|                           | 4b      | Settings and locations where the data were collected                                                                                  | Page 5 of the manuscript.                                                                                                               |
| Interventions             | 5       | The interventions for each group with sufficient details to allow replication, including how and when they were actually administered | Page 5 of the manuscript.                                                                                                               |
| Outcomes                  | 6a      | Completely defined pre-specified primary and secondary outcome measures, including how and when they were assessed                    | Page 5 of the manuscript.                                                                                                               |
|                           | 6b      | Any changes to trial outcomes after the trial commenced, with reasons                                                                 | Not applicable.                                                                                                                         |
| Sample size               | 7a      | How sample size was determined                                                                                                        | The trial was a phase 1 clinical trial. The sample size was primarily based on clinical feasibility.                                    |

|                                                      |     |                                                                                                                                                                                             |                                                                                                                                                                                           |
|------------------------------------------------------|-----|---------------------------------------------------------------------------------------------------------------------------------------------------------------------------------------------|-------------------------------------------------------------------------------------------------------------------------------------------------------------------------------------------|
|                                                      | 7b  | When applicable, explanation of any interim analyses and stopping guidelines                                                                                                                | Not applicable.                                                                                                                                                                           |
| Randomisation:                                       |     |                                                                                                                                                                                             |                                                                                                                                                                                           |
| Sequence generation                                  | 8a  | Method used to generate the random allocation sequence                                                                                                                                      | Not applicable.                                                                                                                                                                           |
|                                                      | 8b  | Type of randomisation; details of any restriction (such as blocking and block size)                                                                                                         | Not applicable.                                                                                                                                                                           |
| Allocation concealment mechanism                     | 9   | Mechanism used to implement the random allocation sequence (such as sequentially numbered containers), describing any steps taken to conceal the sequence until interventions were assigned | Not applicable.                                                                                                                                                                           |
| Implementation                                       | 10  | Who generated the random allocation sequence, who enrolled participants, and who assigned participants to interventions                                                                     | Not applicable.                                                                                                                                                                           |
| Blinding                                             | 11a | If done, who was blinded after assignment to interventions (for example, participants, care providers, those assessing outcomes) and how                                                    | Not applicable.                                                                                                                                                                           |
|                                                      | 11b | If relevant, description of the similarity of interventions                                                                                                                                 | Not applicable.                                                                                                                                                                           |
| Statistical methods                                  | 12a | Statistical methods used to compare groups for primary and secondary outcomes                                                                                                               | Not applicable. Statistical methods are described on Page 11.                                                                                                                             |
|                                                      | 12b | Methods for additional analyses, such as subgroup analyses and adjusted analyses                                                                                                            | Not applicable. Statistical methods are described on Page 11.                                                                                                                             |
| <b>Results</b>                                       |     |                                                                                                                                                                                             |                                                                                                                                                                                           |
| Participant flow (a diagram is strongly recommended) | 13a | For each group, the numbers of participants who were randomly assigned, received intended treatment, and were analysed for the primary outcome                                              | Not applicable. Please see Figure 1B for the number of patients consented, the number of patients who withdrew prior to vaccination, and the number of patients who received the vaccine. |
|                                                      | 13b | For each group, losses and exclusions after randomisation, together with reasons                                                                                                            | Not applicable. Please see Figure 1B for the number of patients consented, the number of patients who withdrew prior to vaccination, and the number of patients who received the vaccine. |
| Recruitment                                          | 14a | Dates defining the periods of recruitment and follow-up                                                                                                                                     | Page 5 of the manuscript.                                                                                                                                                                 |
|                                                      | 14b | Why the trial ended or was stopped                                                                                                                                                          | The target enrollment was completed.                                                                                                                                                      |
| Baseline data                                        | 15  | A table showing baseline demographic and clinical characteristics for each group                                                                                                            | Table 1 includes baseline demographic and clinical characteristics for the cohort.                                                                                                        |

|                          |     |                                                                                                                                                   |                                                                                                                                                                                                                                                                                          |
|--------------------------|-----|---------------------------------------------------------------------------------------------------------------------------------------------------|------------------------------------------------------------------------------------------------------------------------------------------------------------------------------------------------------------------------------------------------------------------------------------------|
| Numbers analysed         | 16  | For each group, number of participants (denominator) included in each analysis and whether the analysis was by original assigned groups           | Not applicable. Please see Figure 1B for the number of patients consented, the number of patients who withdrew prior to vaccination, and the number of patients who received the vaccine. All patients who received the vaccine were included in the safety and immunogenicity analyses. |
| Outcomes and estimation  | 17a | For each primary and secondary outcome, results for each group, and the estimated effect size and its precision (such as 95% confidence interval) | Given that this is a phase 1 clinical trial, the results are primarily descriptive as described in the protocol and the manuscript. 95% confidence interval was included for recurrence-free survival.                                                                                   |
|                          | 17b | For binary outcomes, presentation of both absolute and relative effect sizes is recommended                                                       | Not applicable.                                                                                                                                                                                                                                                                          |
| Ancillary analyses       | 18  | Results of any other analyses performed, including subgroup analyses and adjusted analyses, distinguishing pre-specified from exploratory         | Not applicable.                                                                                                                                                                                                                                                                          |
| Harms                    | 19  | All important harms or unintended effects in each group (for specific guidance see CONSORT for harms)                                             | Page 15 of the manuscript and Figure 6A describe the safety of the vaccine and all adverse events                                                                                                                                                                                        |
| <b>Discussion</b>        |     |                                                                                                                                                   |                                                                                                                                                                                                                                                                                          |
| Limitations              | 20  | Trial limitations, addressing sources of potential bias, imprecision, and, if relevant, multiplicity of analyses                                  | Page 17-19 of the manuscript.                                                                                                                                                                                                                                                            |
| Generalisability         | 21  | Generalisability (external validity, applicability) of the trial findings                                                                         | Page 18-19 of the manuscript.                                                                                                                                                                                                                                                            |
| Interpretation           | 22  | Interpretation consistent with results, balancing benefits and harms, and considering other relevant evidence                                     | Page 19-20 of the manuscript.                                                                                                                                                                                                                                                            |
| <b>Other information</b> |     |                                                                                                                                                   |                                                                                                                                                                                                                                                                                          |
| Registration             | 23  | Registration number and name of trial registry                                                                                                    | ClinicalTrials.Gov registration number: NCT02348320                                                                                                                                                                                                                                      |
| Protocol                 | 24  | Where the full trial protocol can be accessed, if available                                                                                       | Attached. Not currently publically available.                                                                                                                                                                                                                                            |
| Funding                  | 25  | Sources of funding and other support (such as supply of drugs), role of funders                                                                   | Page 20-21 of the manuscript.                                                                                                                                                                                                                                                            |

\*We strongly recommend reading this statement in conjunction with the CONSORT 2010 Explanation and Elaboration for important clarifications on all the items. If relevant, we also recommend reading CONSORT extensions for cluster randomised trials, non-inferiority and equivalence trials, non-pharmacological treatments, herbal interventions, and pragmatic trials. Additional extensions are forthcoming: for those and for up to date references relevant to this checklist, see [www.consort-statement.org](http://www.consort-statement.org).
